# Supplementary material for: Improved performance of pure formamidinium lead iodide perovskite light-emitting diodes by moisture treatment
Source: Royal Society of Chemistry journal article supplement (doi:10.1039/c7tc03385k), 2017-01-01
Supplement: c7tc03385k1.pdf [file c7tc03385k1.pdf]

## **Improved Performance of Pure Formamidinium Lead Iodide Perovskite Light-Emitting Diodes by Moisture Treatment**

Fusheng Ma,<sup>†</sup> Nan Li,<sup>†</sup> Jiangwei Li,<sup>†</sup> Zhen Jia,<sup>†</sup> Jie Xue,<sup>†</sup> Liduo Wang,<sup>†</sup> and Juan Qiao<sup>\*†</sup>

<sup>†</sup>Key Lab of Organic Optoelectronics and Molecular Engineering of Ministry of Education, Department of Chemistry, Tsinghua University, Beijing 100084, China

\*E-mail: [qjuan@mail.tsinghua.edu.cn](mailto:qjuan@mail.tsinghua.edu.cn)

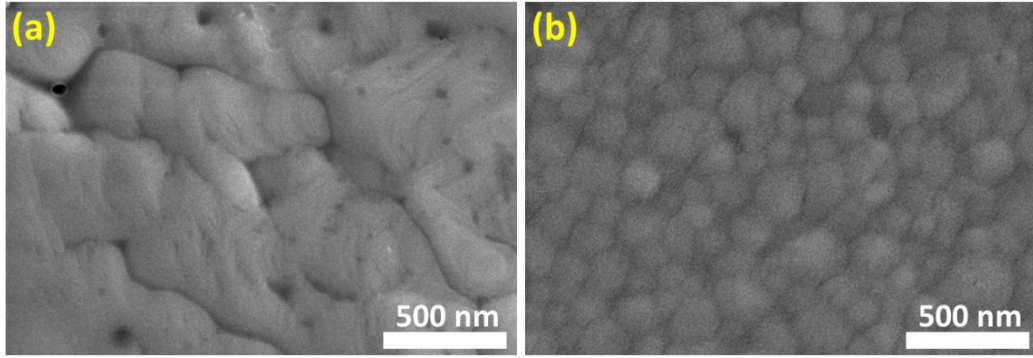

**Fig. S1** The enlarged SEM images of FAPbI<sub>3</sub> films without (a) and with (b) chloroform solvent engineering.

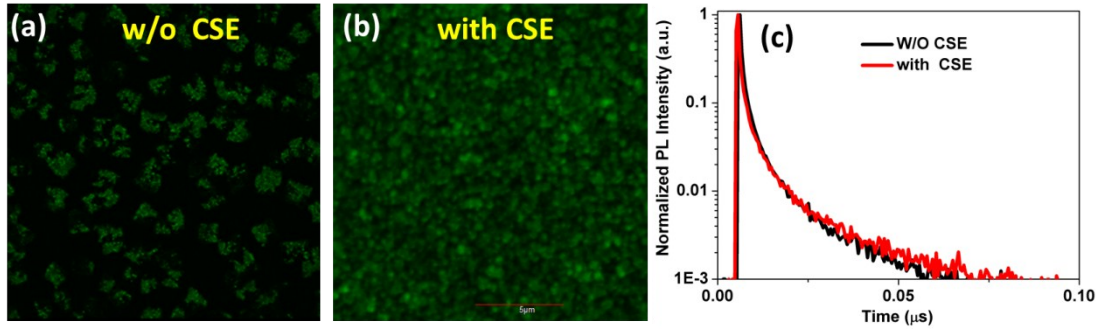

**Fig. S2** Confocal fluorescence microscopy images of perovskite film (a) without and (b) with CSE. (c) Time-resolved PL decay curves of perovskite film with and without CSE.

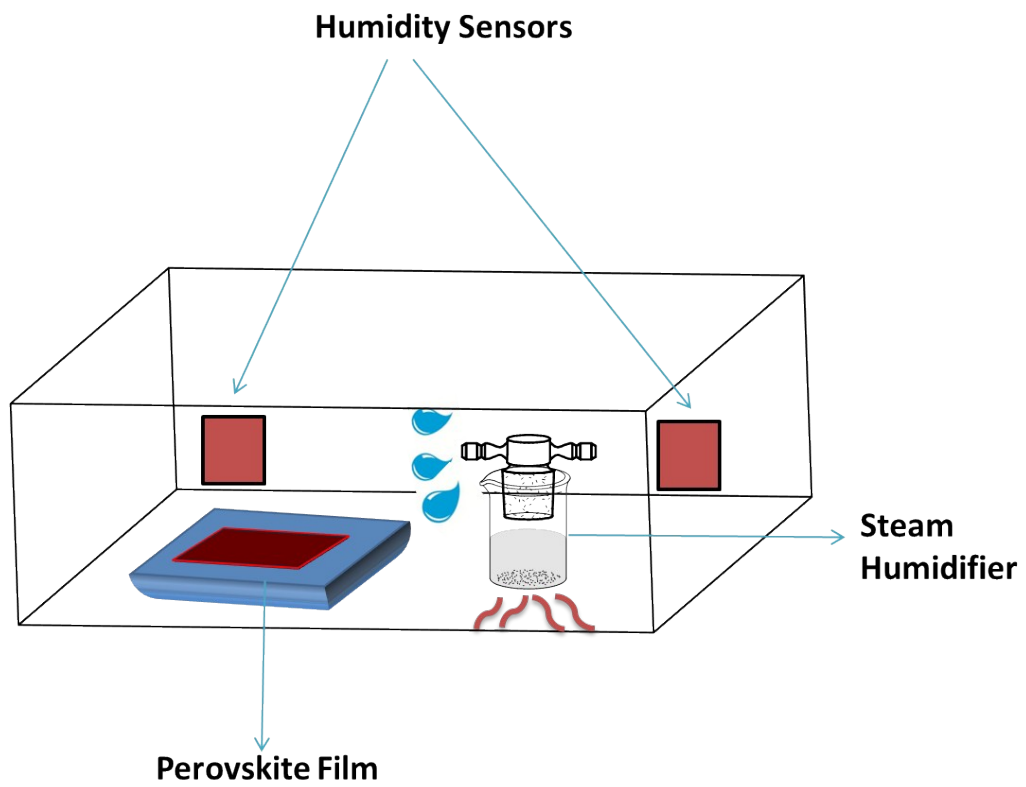

**Fig. S3** Scheme of the humidity-controlled chamber.

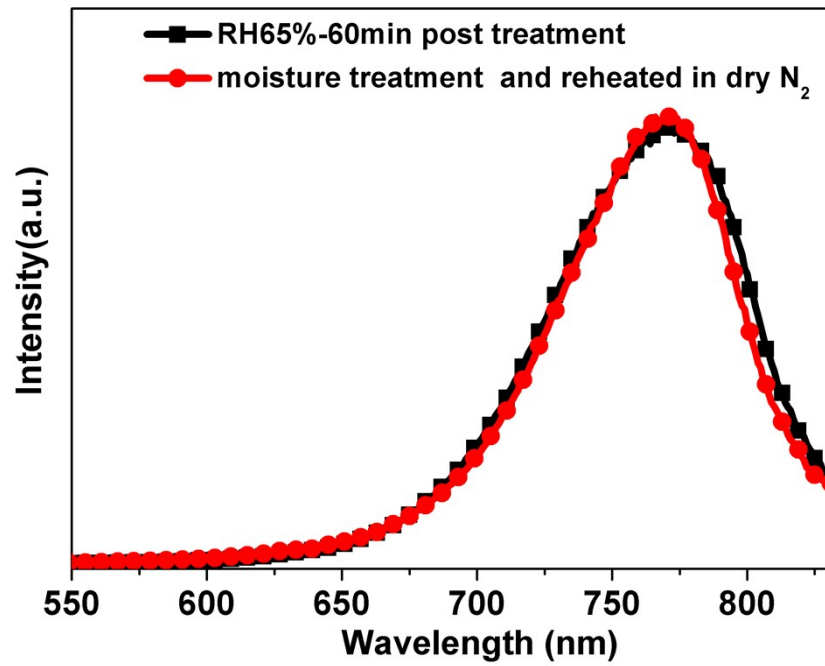

**Fig. S4** The PL spectra of perovskite film with moisture treatment and further post heat-treatment at 65 °C in dried N<sub>2</sub>.

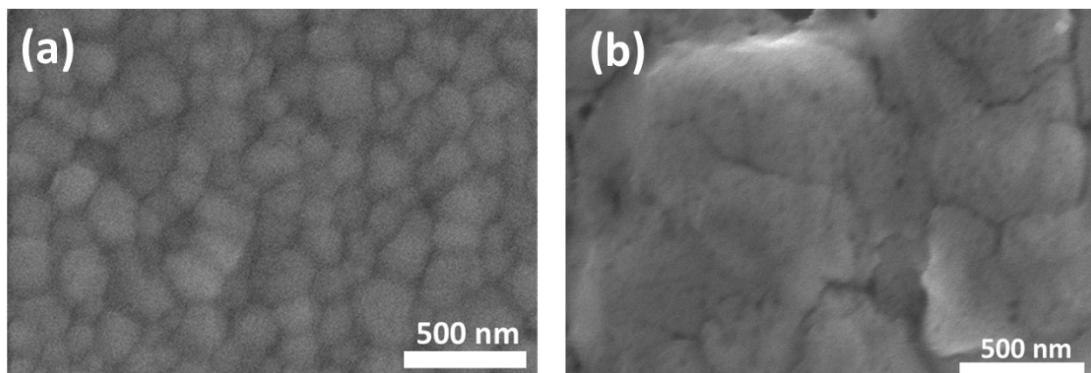

**Fig. S5** SEM images of the FAPbI<sub>3</sub> films after (a) 0%RH-60 min and (b) 90%RH-30 min treatment.

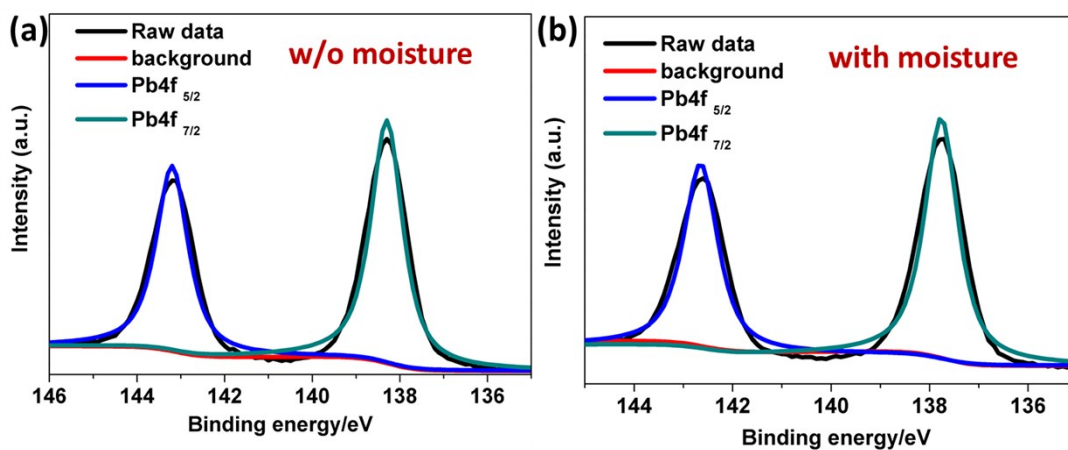

**Fig. S6** The spectra of Pb 4f<sub>7/2</sub> and Pb 4f<sub>5/2</sub> of perovskite film (a) with and (b) without moisture treatment.

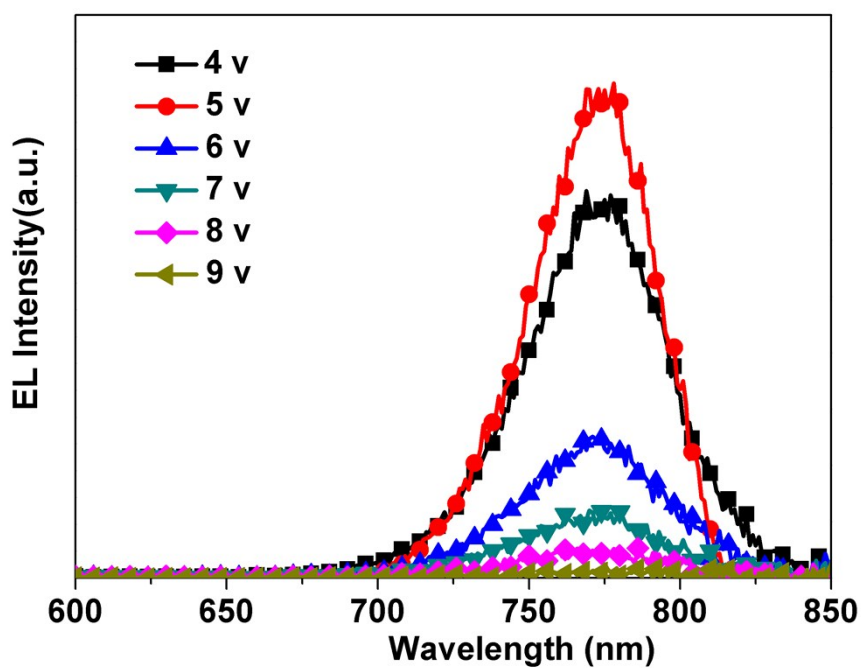

**Fig. S7** Electroluminescence spectra of PeLEDs with 65%RH-60 min post treatment under different bias voltages.

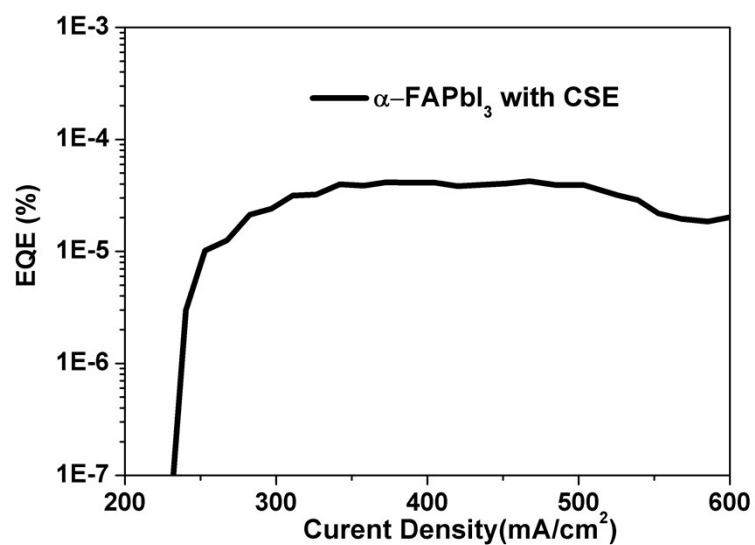

**Fig. S8** External quantum efficiency (EQE) versus current density of pure  $\alpha$ -FAPbI<sub>3</sub> with CSE.

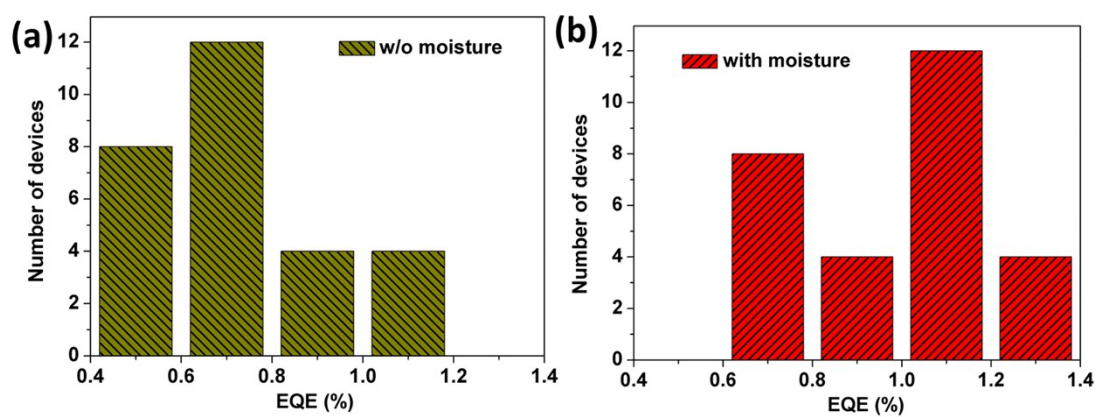

**Fig. S9** Distributions of devices EQEs (a) before and after (b) 65%RH-60 min moisture treatment.

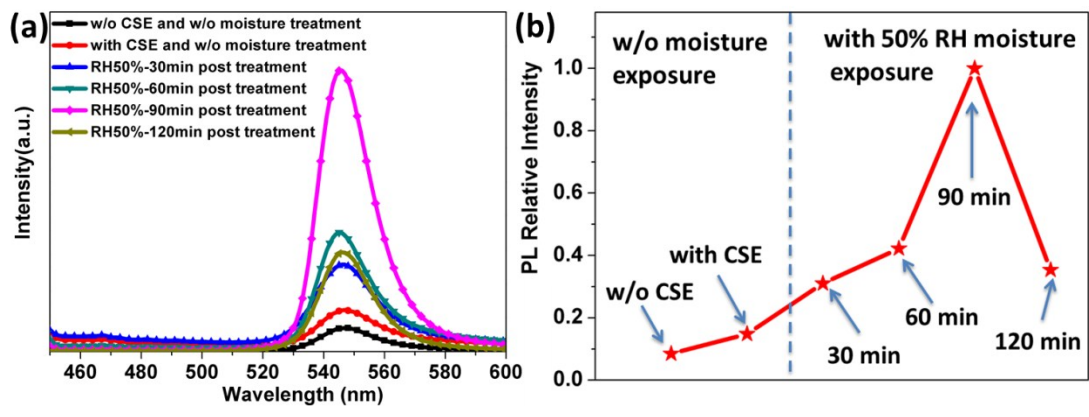

**Fig. S10** The PL spectra (a) and the relative PL intensity (b) of MAPbBr<sub>3</sub> films without CSE, with CSE and exposed to moisture with different time under 50% relative humidity.
